# Supplementary material for: Bioassays of Beauveria bassiana Isolates against the Fall Armyworm, Spodoptera frugiperda
Source: MDPI journal article supplement (doi:10.3390/jof8070717), 2022-07-08
Supplement: s1 [file s1]

**Supplementary Table S1.** Germination rates of the *B. bassiana* isolates used in this study against FAW.

| Isolates | Percent Germination $\pm$ Means Standard Error |                                   |                                   |
|----------|------------------------------------------------|-----------------------------------|-----------------------------------|
|          | 1 x 10 <sup>6</sup><br>Conidia/mL              | 1 x 10 <sup>7</sup><br>Conidia/mL | 1 x 10 <sup>8</sup><br>Conidia/mL |
| QB-3.45  | 90.3 $\pm$ 0.9                                 | 91.3 $\pm$ 2.4                    | 90.0 $\pm$ 1.5                    |
| QB-3.46  | 90.0 $\pm$ 1.2                                 | 90.7 $\pm$ 1.2                    | 90.0 $\pm$ 1.2                    |
| QB-3.428 | 91.7 $\pm$ 1.2                                 | 92.7 $\pm$ 0.9                    | 91.3 $\pm$ 0.7                    |
| QB-3.436 | 90.7 $\pm$ 0.9                                 | 90.7 $\pm$ 0.9                    | 90.0 $\pm$ 0.6                    |
| LNSE-22  | 90.7 $\pm$ 0.9                                 | 91.3 $\pm$ 2.8                    | 92.7 $\pm$ 0.7                    |
| SPLE-24  | 90.0 $\pm$ 2.3                                 | 90.7 $\pm$ 1.5                    | 93.0 $\pm$ 1.2                    |
| ZGNKY-01 | 91.0 $\pm$ 2.1                                 | 91.3 $\pm$ 2.7                    | 91.7 $\pm$ 1.8                    |
| ZGNKY-1  | 90.3 $\pm$ 0.9                                 | 91.0 $\pm$ 1.5                    | 93.0 $\pm$ 1.0                    |
| ZGNKY-2  | 90.3 $\pm$ 1.2                                 | 91.0 $\pm$ 2.1                    | 93.7 $\pm$ 1.8                    |
| ZGNKY-3  | 91.7 $\pm$ 1.2                                 | 90.0 $\pm$ 0.6                    | 92.7 $\pm$ 1.8                    |
| ZGNKY-4  | 91.7 $\pm$ 1.8                                 | 90.3 $\pm$ 2.3                    | 91.3 $\pm$ 1.9                    |
| ZGNKY-5  | 91.0 $\pm$ 1.2                                 | 90.0 $\pm$ 1.5                    | 92.0 $\pm$ 1.5                    |

**Supplementary Table S2.** Cumulative mortality of eggs and neonate larvae of *S. frugiperda* induced by *B. bassiana* isolates treated with 1  $\times$  10<sup>6</sup> conidia/mL.

| Isolates   | Percent Mortality $\pm$ Means Standard Error |                       |                         |
|------------|----------------------------------------------|-----------------------|-------------------------|
|            | Eggs<br>Mortality                            | Neonates<br>Mortality | Cumulative<br>Mortality |
| QB-3.45    | 30.0 $\pm$ 1.7 a                             | 9.5 $\pm$ 0.3 ab      | 36.7 $\pm$ 1.8 a        |
| QB-3.46    | 25.3 $\pm$ 1.2 a                             | 13.4 $\pm$ 2.1 ab     | 35.3 $\pm$ 2.8 a        |
| QB-3.428   | 28.7 $\pm$ 1.8 a                             | 14.9 $\pm$ 1.5 a      | 39.3 $\pm$ 2.7 a        |
| QB-3.436   | 20.7 $\pm$ 1.5 ab                            | 13.4 $\pm$ 1.2 ab     | 31.3 $\pm$ 2.2 ab       |
| LNSE-22    | 24.0 $\pm$ 1.5 a                             | 9.6 $\pm$ 0.9 ab      | 31.3 $\pm$ 1.8 ab       |
| SPLE-24    | 10.7 $\pm$ 0.9 bc                            | 6.7 $\pm$ 1.2 ab      | 16.7 $\pm$ 0.9 bc       |
| ZGNKY-01   | 11.3 $\pm$ 0.7 bc                            | 4.5 $\pm$ 1.0 ab      | 15.3 $\pm$ 1.7 bc       |
| ZGNKY-1    | 4.0 $\pm$ 0.6 c                              | 6.3 $\pm$ 0.6 ab      | 10.0 $\pm$ 1.0 c        |
| ZGNKY-2    | 5.3 $\pm$ 1.5 c                              | 3.5 $\pm$ 0.3 ab      | 8.7 $\pm$ 1.5 c         |
| ZGNKY-3    | 2.0 $\pm$ 0.6 c                              | 4.8 $\pm$ 0.9 ab      | 6.7 $\pm$ 0.3 c         |
| ZGNKY-4    | 8.0 $\pm$ 1.5 c                              | 2.2 $\pm$ 0.6 ab      | 10.0 $\pm$ 2.0 c        |
| ZGNKY-5    | 3.3 $\pm$ 0.9 c                              | 1.4 $\pm$ 0.7 b       | 4.7 $\pm$ 0.3 c         |
| <i>F</i>   | 19.5                                         | 3.63                  | 16.1                    |
| <i>df</i>  | 12                                           | 12                    | 12                      |
| <i>P</i> < | 0.000                                        | 0.002                 | 0.000                   |

Means  $\pm$  SE within a column not sharing common letters are significantly different using Tuckey's test at  $p < 0.05$ .

**Supplementary Table S3.** Cumulative mortality of eggs and neonate larvae of FAW induced by *B. bassiana* isolates treated with  $1 \times 10^7$  conidia/ml.

| Isolates   | Percent Mortality $\pm$ Means Standard Error |                     |                      |
|------------|----------------------------------------------|---------------------|----------------------|
|            | Eggs Mortality                               | Neonates Mortality  | Cumulative Mortality |
| QB-3.45    | 87.3 $\pm$ 1.5 a                             | 47.6 $\pm$ 1.2 ab   | 93.3 $\pm$ 0.3 a     |
| QB-3.46    | 82.7 $\pm$ 2.4 a                             | 53.6 $\pm$ 1.5 a    | 92.0 $\pm$ 1.5 a     |
| QB-3.428   | 79.3 $\pm$ 2.2 a                             | 45.3 $\pm$ 0.9 a    | 88.7 $\pm$ 1.5 a     |
| QB-3.436   | 56.0 $\pm$ 2.3 b                             | 34.8 $\pm$ 1.2 abc  | 71.3 $\pm$ 1.2 b     |
| LNSE-22    | 50.0 $\pm$ 2.0 bc                            | 30.7 $\pm$ 1.2 abcd | 65.3 $\pm$ 0.9 bc    |
| SPLE-24    | 30.7 $\pm$ 0.3 def                           | 20.2 $\pm$ 1.2 bcde | 44.7 $\pm$ 1.2 de    |
| ZGNKY-01   | 39.3 $\pm$ 2.2 bcd                           | 17.6 $\pm$ 0.7 cde  | 50.0 $\pm$ 2.5 cd    |
| ZGNKY-1    | 20.0 $\pm$ 2.3 efg                           | 15.8 $\pm$ 1.2 cde  | 32.7 $\pm$ 1.7 ef    |
| ZGNKY-2    | 12.7 $\pm$ 1.5 fg                            | 12.2 $\pm$ 1.2 cde  | 23.3 $\pm$ 2.2 f     |
| ZGNKY-3    | 15.3 $\pm$ 1.5 fg                            | 10.2 $\pm$ 1.5 de   | 24.0 $\pm$ 1.2 f     |
| ZGNKY-4    | 35.3 $\pm$ 1.5 cde                           | 10.3 $\pm$ 0.9 cde  | 38.7 $\pm$ 1.9 def   |
| ZGNKY-5    | 18.7 $\pm$ 2.0 efg                           | 8.2 $\pm$ 0.9 de    | 25.3 $\pm$ 1.9 f     |
| <i>F</i>   | 60.3                                         | 11.6                | 90.3                 |
| <i>df</i>  | 12                                           | 12                  | 12                   |
| <i>P</i> < | 0.000                                        | 0.000               | 0.000                |

Means  $\pm$  SE within a column not sharing common letters are significantly different using Tuckey's test at  $p < 0.05$ .

**Supplementary Table S4.** Cumulative mortality of eggs and neonate larvae of FAW induced by *B. bassiana* isolates treated with  $1 \times 10^8$  conidia/ml.

| Isolates   | Percent Mortality $\pm$ Means Standard Error |                     |                      |
|------------|----------------------------------------------|---------------------|----------------------|
|            | Eggs Mortality                               | Neonates Mortality  | Cumulative Mortality |
| QB-3.45    | 70.0 $\pm$ 1.2 a                             | 20.0 $\pm$ 0.6 abcd | 76.0 $\pm$ 1.5 a     |
| QB-3.46    | 64.7 $\pm$ 1.9 ab                            | 34.6 $\pm$ 0.9 a    | 77.3 $\pm$ 2.0 a     |
| QB-3.428   | 54.7 $\pm$ 1.8 b                             | 30.8 $\pm$ 1.5 a    | 68.7 $\pm$ 2.3 ab    |
| QB-3.436   | 40.0 $\pm$ 2.3 c                             | 25.6 $\pm$ 1.2 ab   | 55.3 $\pm$ 1.7 bc    |
| LNSE-22    | 35.3 $\pm$ 1.2 c                             | 21.7 $\pm$ 0.6 abc  | 49.3 $\pm$ 0.9 c     |
| SPLE-24    | 15.3 $\pm$ 1.2 de                            | 12.6 $\pm$ 0.9 bcde | 26.0 $\pm$ 2.1 d     |
| ZGNKY-01   | 18.7 $\pm$ 0.9 d                             | 10.6 $\pm$ 0.9 bcde | 27.3 $\pm$ 1.8 d     |
| ZGNKY-1    | 10.0 $\pm$ 1.2 de                            | 9.6 $\pm$ 0.9 cde   | 18.7 $\pm$ 2.0 de    |
| ZGNKY-2    | 6.7 $\pm$ 0.9 de                             | 7.9 $\pm$ 1.2 cde   | 14.0 $\pm$ 2.1 de    |
| ZGNKY-3    | 8.0 $\pm$ 0.6 de                             | 7.2 $\pm$ 0.7 cde   | 14.7 $\pm$ 1.2 de    |
| ZGNKY-4    | 17.3 $\pm$ 2.3 d                             | 5.6 $\pm$ 0.3 cde   | 22.0 $\pm$ 2.6 d     |
| ZGNKY-5    | 8.7 $\pm$ 0.9 de                             | 3.6 $\pm$ 0.9 de    | 12.0 $\pm$ 1.5 de    |
| <i>F</i>   | 69.9                                         | 10.3                | 52.5                 |
| <i>df</i>  | 12                                           | 12                  | 12                   |
| <i>P</i> < | 0.000                                        | 0.000               | 0.000                |

Means  $\pm$  SE within a column not sharing common letters are significantly different using Tuckey's test at  $p < 0.05$ .

**Supplementary Table S5.** Mortality of second instar larvae of FAW infected with different concentrations of *B. bassiana* isolates.

| <i>Beauveria bassiana</i><br>Isolates | Percent Mortality $\pm$ Means Standard Error |                                   |                                   |
|---------------------------------------|----------------------------------------------|-----------------------------------|-----------------------------------|
|                                       | 1 x 10 <sup>6</sup><br>conidia/mL            | 1 x 10 <sup>7</sup><br>conidia/mL | 1 x 10 <sup>8</sup><br>conidia/mL |
| QB-3.45                               | 10.0 $\pm$ 1.0 a                             | 9.5 $\pm$ 0.3 a                   | 25.6 $\pm$ 1.2 a                  |
| QB-3.46                               | 8.9 $\pm$ 1.2 a                              | 13.4 $\pm$ 2.1 ab                 | 20.0 $\pm$ 1.0 ab                 |
| QB-3.428                              | 7.8 $\pm$ 0.9 a                              | 14.9 $\pm$ 1.5 abc                | 17.8 $\pm$ 0.9 abc                |
| QB-3.436                              | 7.8 $\pm$ 0.7a                               | 13.4 $\pm$ 1.2 abc                | 14.4 $\pm$ 1.5 abcd               |
| LNSE-22                               | 4.4 $\pm$ 0.9 a                              | 9.6 $\pm$ 0.9 abc                 | 10.0 $\pm$ 1.0 bcd                |
| SPLE-24                               | 4.4 $\pm$ 0.3 a                              | 6.7 $\pm$ 1.2 bc                  | 10.0 $\pm$ 1.0 bcd                |
| ZGNKY-01                              | 1.1 $\pm$ 0.3 a                              | 4.5 $\pm$ 1.0 bc                  | 7.8 $\pm$ 0.3 bcd                 |
| ZGNKY-1                               | 1.1 $\pm$ 0.3 a                              | 6.3 $\pm$ 0.6 c                   | 5.6 $\pm$ 0.3 cd                  |
| ZGNKY-2                               | 1.1 $\pm$ 0.3 a                              | 3.5 $\pm$ 0.3 c                   | 4.4 $\pm$ 0.3 cd                  |
| ZGNKY-3                               | 1.1 $\pm$ 0.3 a                              | 4.8 $\pm$ 0.9 c                   | 5.6 $\pm$ 0.7 cd                  |
| ZGNKY-4                               | 2.2 $\pm$ 0.3 a                              | 2.2 $\pm$ 0.6 bc                  | 12.2 $\pm$ 0.3 abcd               |
| ZGNKY-5                               | 1.1 $\pm$ 0.3 a                              | 1.4 $\pm$ 0.7 c                   | 3.3 $\pm$ 0.0 d                   |
| <i>F</i>                              | 2.89                                         | 6.35                              | 7.13                              |
| <i>df</i>                             | 12                                           | 12                                | 12                                |
| <i>P</i> <                            | 0.011                                        | 0.000                             | 0.000                             |

Means  $\pm$  SE within a column not sharing common letters are significantly different using Tuckey's test at  $p < 0.05$ .

**Supplementary Table S6.** Feeding efficacy of second instar larvae of FAW infected with different concentrations of *B. bassiana* isolates.

| <i>Beauveria bassiana</i><br>Isolates | Percent Feeding Efficacy $\pm$ Means Standard Error |                                   |                                   |
|---------------------------------------|-----------------------------------------------------|-----------------------------------|-----------------------------------|
|                                       | 1 x 10 <sup>6</sup><br>conidia/mL                   | 1 x 10 <sup>7</sup><br>conidia/mL | 1 x 10 <sup>8</sup><br>conidia/mL |
| QB-3.45                               | 56.9 $\pm$ 1.2 a                                    | 65.3 $\pm$ 2.0 a                  | 77.8 $\pm$ 0.9 a                  |
| QB-3.46                               | 54.2 $\pm$ 2.3 a                                    | 61.1 $\pm$ 3.2 ab                 | 72.2 $\pm$ 1.5 ab                 |
| QB-3.428                              | 48.6 $\pm$ 1.5 ab                                   | 58.3 $\pm$ 0.6 abc                | 69.4 $\pm$ 1.9 ab                 |
| QB-3.436                              | 43.1 $\pm$ 0.7 abc                                  | 47.2 $\pm$ 1.5 abcd               | 54.2 $\pm$ 1.0 abc                |
| LNSE-22                               | 34.7 $\pm$ 0.3 abcd                                 | 44.2 $\pm$ 1.5 abcd               | 51.4 $\pm$ 1.3 bcd                |
| SPLE-24                               | 22.2 $\pm$ 1.5 cde                                  | 25.0 $\pm$ 1.0 def                | 29.2 $\pm$ 1.0 def                |
| ZGNKY-01                              | 26.4 $\pm$ 0.9 bcde                                 | 33.3 $\pm$ 1.2 bcde               | 37.5 $\pm$ 1.2 cde                |
| ZGNKY-1                               | 15.3 $\pm$ 0.7 de                                   | 18.1 $\pm$ 0.3 def                | 22.2 $\pm$ 0.9 ef                 |
| ZGNKY-2                               | 2.6 $\pm$ 0.9 e                                     | 3.4 $\pm$ 0.9 ef                  | 4.8 $\pm$ 0.7 ef                  |
| ZGNKY-3                               | 8.3 $\pm$ 0.6 e                                     | 9.7 $\pm$ 0.3 ef                  | 13.9 $\pm$ 0.9 ef                 |
| ZGNKY-4                               | 26.4 $\pm$ 0.9 bcde                                 | 31.9 $\pm$ 1.2 cdef               | 37.5 $\pm$ 1.5 cde                |
| ZGNKY-5                               | 8.3 $\pm$ 0.6 e                                     | 12.5 $\pm$ 0.6 ef                 | 18.1 $\pm$ 1.2 ef                 |
| <i>F</i>                              | 17.2                                                | 13.7                              | 24.8                              |
| <i>df</i>                             | 12                                                  | 12                                | 12                                |
| <i>P</i> <                            | 0.000                                               | 0.000                             | 0.000                             |

Means  $\pm$  SE within a column not sharing common letters are significantly different using Tuckey's test at  $p < 0.05$ .

**Supplementary Table S7.** Mortality of pupae of FAW infected with different concentrations of *B. bassiana* isolates

| <i>Beauveria bassiana</i><br>Isolates | Percent Mortality $\pm$ Means Standard Error |                                   |                                   |
|---------------------------------------|----------------------------------------------|-----------------------------------|-----------------------------------|
|                                       | 1 x 10 <sup>6</sup><br>conidia/mL            | 1 x 10 <sup>7</sup><br>conidia/mL | 1 x 10 <sup>8</sup><br>conidia/mL |
| QB-3.45                               | 6.7 $\pm$ 0.3 a                              | 10.0 $\pm$ 0.0 a                  | 20.0 $\pm$ 0.6 a                  |
| QB-3.46                               | 3.3 $\pm$ 0.3 a                              | 6.7 $\pm$ 0.3 a                   | 16.7 $\pm$ 0.7 ab                 |
| QB-3.428                              | 3.3 $\pm$ 0.3 a                              | 6.7 $\pm$ 0.3 a                   | 13.3 $\pm$ 0.3 ab                 |
| QB-3.436                              | 3.3 $\pm$ 0.3 a                              | 6.7 $\pm$ 0.3 a                   | 10.0 $\pm$ 0.0 ab                 |
| LNSE-22                               | 0.0 $\pm$ 0.0 a                              | 3.3 $\pm$ 0.3 a                   | 6.7 $\pm$ 0.3 ab                  |
| SPLE-24                               | 3.3 $\pm$ 0.3 a                              | 3.3 $\pm$ 0.3 a                   | 6.7 $\pm$ 0.3 ab                  |
| ZGNKY-01                              | 0.0 $\pm$ 0.0 a                              | 3.3 $\pm$ 0.3 a                   | 3.3 $\pm$ 0.3 ab                  |
| ZGNKY-1                               | 0.0 $\pm$ 0.0 a                              | 3.3 $\pm$ 0.3 a                   | 3.3 $\pm$ 0.3 ab                  |
| ZGNKY-2                               | 0.0 $\pm$ 0.0 a                              | 3.3 $\pm$ 0.3 a                   | 6.7 $\pm$ 0.3 ab                  |
| ZGNKY-3                               | 0.0 $\pm$ 0.0 a                              | 3.3 $\pm$ 0.3 a                   | 6.7 $\pm$ 0.3 ab                  |
| ZGNKY-4                               | 0.0 $\pm$ 0.0 a                              | 3.3 $\pm$ 0.3 a                   | 3.3 $\pm$ 0.3 ab                  |
| ZGNKY-5                               | 0.0 $\pm$ 0.0 a                              | 3.3 $\pm$ 0.3 a                   | 3.3 $\pm$ 0.3 ab                  |
| <i>F</i>                              | 1.13                                         | 0.67                              | 2.38                              |
| <i>df</i>                             | 12                                           | 12                                | 12                                |
| <i>P</i> <                            | 0.377                                        | 0.766                             | 0.031                             |

Means  $\pm$  SE within a column not sharing common letters are significantly different using Tuckey's test at  $p < 0.05$ .

**Supplementary Table S8.** Analysis of variance comparison table for mean percent mortality of eggs, neonate, larvae and pupae of FAW treated with different concentrations of isolates of *B. bassiana* under laboratory conditions.

| Source            | DF     | SS     | MS      | F      | P      |
|-------------------|--------|--------|---------|--------|--------|
| Concentrations    | 2      | 16776  | 8387.8  | 280.34 | 0.0000 |
| Treatments        | 11     | 34736  | 3157.8  | 106.20 | 0.0000 |
| Life Stages       | 3      | 38577  | 12859.1 | 432.47 | 0.0000 |
| Conc*Treat        | 22     | 4979   | 226.3   | 7.56   | 0.0000 |
| Conc*Stages       | 6      | 6175   | 1029.1  | 34.40  | 0.0000 |
| Treat*Stages      | 33     | 19012  | 576.1   | 19.26  | 0.0000 |
| Conc*Treat*Stages | 66     | 3285   | 49.8    | 1.66   | 0.0025 |
| Error             | 286    | 8557   | 29.9    |        |        |
| Total             | 431    | 132103 |         |        |        |
| Grand Mean        | 14.451 |        |         |        |        |
| CV                | 37.85  |        |         |        |        |
